# Supplementary material for: LINC00152 Drives a Competing Endogenous RNA Network in Human Hepatocellular Carcinoma
Source: MDPI journal article supplement (doi:10.3390/cells11091528), 2022-05-03
Supplement: s1 [file s1]

# **LINC00152 drives a competing endogenous RNA network in human hepatocellular carcinoma**

**Rossella Pellegrino <sup>1,\*</sup>, Mirco Castoldi <sup>2</sup>, Fabio Ticconi <sup>3</sup>, Britta Skawran <sup>4</sup>, Jan Budczies.<sup>1</sup>, Fabian Rose <sup>1</sup>, Constantin Schwab <sup>1</sup>, Kai Breuhahn <sup>1</sup>, Ulf P. Neumann <sup>5,6</sup>, Nadine T. Gaisa <sup>7</sup>, Sven H. Loosen <sup>2</sup>, Tom Luedde <sup>2</sup>, Ivan G. Costa <sup>3</sup> and Thomas Longerich <sup>1</sup>**

- <sup>1</sup> Institute of Pathology, Heidelberg University Hospital, 69120 Heidelberg, Germany; jan.budczies@med.uni-heidelberg.de (J.B.); fabian.rose@med.uni-heidelberg.de (F.R.); constantin.schwab@med.uni-heidelberg.de (C.S.); kai.breuhahn@med.uni-heidelberg.de (K.B.); thomas.longerich@med.uni-heidelberg.de (T.L.)
  - <sup>2</sup> Clinic for Gastroenterology, Hepatology and Infectious Diseases, University Hospital Düsseldorf, Medical Faculty of Heinrich Heine University Düsseldorf, 40225 Düsseldorf, Germany; mirco.castoldi@med.uni-duesseldorf.de (M.C.); sven.loosen@med.uni-duesseldorf.de (S.H.L.); tom.luedde@med.uni-duesseldorf.de (T.L.)
  - <sup>3</sup> Institute for Computational Genomics, Joint Research Center for Computational Biomedicine, University Hospital RWTH Aachen, 52074 Aachen, Germany; fabio.ticconi@gmail.com (F.T.); ivan.costa@rwth-aachen.de (I.G.C.)
  - <sup>4</sup> Institute of Human Genetics, Hannover Medical School, 30625 Hannover, Germany; skawran.britta@mh-hannover.de
  - <sup>5</sup> Department of General, Visceral and Transplant Surgery, University Hospital RWTH Aachen, 52074 Aachen, Germany; uneumann@ukaachen.de
  - <sup>6</sup> Department of Surgery, Maastricht University Medical Centre, , 6229 HX Maastricht, The Netherlands
  - <sup>7</sup> Institute of Pathology, University Hospital RWTH Aachen, 52074 Aachen, Germany; ngaisa@ukaachen.de
- \* Correspondence: rossella.pellegrino@med.uni-heidelberg.de; Tel.: +49-(0)6221-56-34094.

**Tables S1-S5**

**Figures S1-S2**

**Supplemental Whole Western Blot Figures**

**Table S1:** Patient's characteristics of expression profiling cohort

|                            |                                 |          |
|----------------------------|---------------------------------|----------|
| <b>Gender</b>              |                                 |          |
|                            | male                            | 29 (76%) |
|                            | female                          | 9 (24%)  |
| <b>Etiology</b>            |                                 |          |
|                            | HBV                             | 8 (21%)  |
|                            | HCV                             | 9 (24%)  |
|                            | alcohol                         | 7 (18%)  |
|                            | cryptogenic                     | 10 (26%) |
|                            | genetic hemochromatosis         | 3 (8%)   |
|                            | alpha1-antitrypsin deficiency   | 1 (3%)   |
| <b>Grading</b>             |                                 |          |
|                            | well differentiated HCC         | 5 (13%)  |
|                            | moderately differentiated HCC   | 28 (74%) |
|                            | poorly differentiated HCC       | 5 (13%)  |
| <b>Localization</b>        |                                 |          |
|                            | bilobar                         | 2 (5%)   |
|                            | left lobe                       | 7 (18%)  |
|                            | right lobe                      | 19 (50%) |
|                            | unknown                         | 10 (26%) |
| <b>Nodules (n=)</b>        |                                 |          |
|                            | single                          | 24 (63%) |
|                            | up to three                     | 5 (13%)  |
|                            | more than three                 | 9 (24%)  |
| <b>Vascular invasion</b>   |                                 |          |
|                            | present                         | 9 (24%)  |
| <b>Metastasis</b>          |                                 |          |
|                            | intrahepatic                    | 13 (34%) |
|                            | extrahepatic                    | 2 (5%)   |
| <b>UICC stage</b>          |                                 |          |
|                            | I                               | 27 (71%) |
|                            | II                              | 9 (24%)  |
|                            | III                             | 0 (0%)   |
|                            | IV                              | 2 (5%)   |
| <b>Previous treatments</b> |                                 |          |
|                            | liver resection                 | 2 (5%)   |
|                            | transarterial chemoembolisation | 1 (3%)   |
| <b>Liver fibrosis</b>      |                                 |          |
|                            | stage 1                         | 5 (13%)  |
|                            | stage 2                         | 4 (11%)  |
|                            | stage 3                         | 5 (13%)  |
|                            | stage 4                         | 17 (45%) |
|                            | unknown                         | 7 (18%)  |

**Table S2.** Predicted *LINC00152*-binding miRNAs

| miRNA           |
|-----------------|
| hsa-let-7f-1-3p |
| hsa-miR-155-5p  |
| hsa-miR-139-5p  |
| hsa-miR-18a-5p  |
| hsa-miR-139-3p  |
| hsa-miR-125a-5p |
| hsa-miR-150     |
| hsa-miR-143     |
| hsa-miR-125a-3p |
| hsa-miR-193b    |
| hsa-miR-223     |
| hsa-let-7d-5p   |
| hsa-miR-497     |
| hsa-miR-195     |
| hsa-miR-23a     |
| hsa-miR-125b    |
| hsa-let-7g      |
| hsa-let-7c      |
| hsa-let-7a      |
| hsa-let-7b-5p   |
| hsa-miR-216a-5p |
| hsa-miR-138-5p  |

**Table S3:** Patient's characteristics of TMA cohort

|                          |                               |          |
|--------------------------|-------------------------------|----------|
| <b>Gender</b>            |                               |          |
|                          | male                          | 39 (78%) |
|                          | female                        | 11 (22%) |
| <b>Etiology</b>          |                               |          |
|                          | HBV                           | 9 (18%)  |
|                          | HCV                           | 5 (10%)  |
|                          | co-infection                  | 1 (2%)   |
|                          | alcohol                       | 3 (6%)   |
|                          | metabolic syndrome            | 5 (10%)  |
|                          | alcohol + metabolic syndrome  | 3 (6%)   |
|                          | primary biliary cholangitis   | 1 (2%)   |
|                          | unknown                       | 23 (46%) |
| <b>Grading</b>           |                               |          |
|                          | well differentiated HCC       | 6 (12%)  |
|                          | moderately differentiated HCC | 22 (44%) |
|                          | poorly differentiated HCC     | 22 (44%) |
| <b>UICC stage</b>        |                               |          |
|                          | I                             | 16 (32%) |
|                          | II                            | 21 (42%) |
|                          | III                           | 12 (24%) |
|                          | IV                            | 1 (2%)   |
| <b>Vascular invasion</b> |                               |          |
|                          | present                       | 22 (44%) |
| <b>Liver cirrhosis</b>   |                               |          |
|                          | present                       | 25 (50%) |

**Table S4:** Primer, siRNA and sgRNA sequence list

| Gene name                                | Sequence                             |
|------------------------------------------|--------------------------------------|
| GAPDH-fw                                 | 5'-TGCACCAACTGCTTAGC-3'              |
| GAPDH-rev                                | 5'-GGCATGGACTGTGGTCATGAG-3'          |
| 18s-fw                                   | 5'-AAACGGCTACCACATCCAAG-3'           |
| 18s-rev                                  | 5'-CCTCCAATGGATCCTCGTTA-3'           |
| LINC00152-fw                             | 5'-CCACCAGCCTCTCCTTGAATA-3'          |
| LINC00152-rev                            | 5'-GGCTGAGTCGTGATTTTCGG-3'           |
| FUT4-fw                                  | 5'-GGTCCGCTACTACCACCAAC-3'           |
| FUT4-rev                                 | 5'-CGAGTTCTCGAAAGCCAGGT-3'           |
| STK39-fw                                 | 5'-CAGGAGGTTATCGGCAGTGG-3'           |
| STK39-rev                                | 5'-CACGTTCTTGCCTGGGTTTG-3'           |
| MAP3K1-fw                                | 5'-GCAGCGTTCTGTCAATGGTC-3'           |
| MAP3K1-rev                               | 5'-ACCAGCATGGCTCTCAATGT-3'           |
| ABCC5-fw                                 | 5'-AGCAGGGGCGCAGGAAT-3'              |
| ABCC5-rev                                | 5'-GTGCTGGTTCTCTCCCTCAC-3'           |
| E2F3-fw                                  | 5'-GGAGCTAGGAGAAAGCGGTC-3'           |
| E2F3-rev                                 | 5'-TGAGGGAGATTTTGAGTTTTTG-3'         |
| KLC2-fw                                  | 5'-AGGGGATGTGTCTGGTCAG-3'            |
| KLC2-rev                                 | 5'-CCTGTGAGGCGTATTGGATCA-3'          |
| PLAU-fw                                  | 5'-CGCAGCCACCGAGCC-3'                |
| PLAU-rev                                 | 5'-CTTTGGAGTCGCTCACGACC-3'           |
| UBE2Q2-fw                                | 5'-GTCAGTTGGAAGCTGGACGA-3'           |
| UBE2Q2-rev                               | 5'-AGGATTCCGTGATGTTGCAGT-3'          |
| PHF19-fw                                 | 5'-ACTGGCTGTGCGGAAAGG-3'             |
| PHF19-rev                                | 5'-AGGACAGCACCATCTTCACG-3'           |
| hsa-let-7c-5p                            | 5'-GTAGTAGGTTGTATGGTTG-3'            |
| hsa-miR-125a-5p                          | 5'-AGACCCTTTAACCTGTGAG-3'            |
| hsa-miR-125b-5p                          | 5'-GAGACCCTAACTTGTGAG-3'             |
| hsa-miR-143-3p                           | 5'-ATGAAGCACTGTAGCTCG-3'             |
| hsa-miR-155-5p                           | 5'-CTAATCGTGATAGGGGTTG-3'            |
| hsa-miR-193b-3p                          | 5'-CCCTCAAAGTCCCGCTG-3'              |
| hsa-miR-195-5p                           | 5'-CAGCACAGAAATATTGGCG-3'            |
| hsa-miR-23a-3p                           | 5'-CATTGCCAGGGATTCCG-3'              |
| mQRT                                     | 5'-CCCAGTTATGGCCGTTTATGCAGGT-3'      |
| UPm2A                                    | 5'-CCCAGTTATGGCCGTTTA-3'             |
| RNU6                                     | 5'-GCAAGGATGACACGCAAATT-3'           |
| siKLC2_1 (final concentration 40nM)      | 5'-AGGACAGCACCATCTTCACG-dTdT-3'      |
| siKLC2_2 (final concentration 40nM)      | 5'-CTGGTACAAGGCCTGTAAA-dTdT-3'       |
| siLINC00152_2 (final concentration 60nM) | 5'-GGAGATGAAACAGGAAGCT-dTdT-3'       |
| siLINC00152_3 (final concentration 60nM) | 5'-TCTATGTGTCTTAATCCCTTGTCTT-dTdT-3' |
| nonsense siRNA (siNS)                    | 5'-TTCTCCGAACGTGTCACGT-dTdT-3'       |

|               |                            |
|---------------|----------------------------|
| sgLINC00152_1 | 5'-GCAGCCTCAGAAATACAAAA-3' |
| sgLINC00152_2 | 5'-CGGGATATCGGGTGGCGGCT-3' |

**Table S5:** Antibody list

| Gene name      | Species           | Catalog Number | Vendor                                   |
|----------------|-------------------|----------------|------------------------------------------|
| KLC2           | Rabbit Polyclonal | ab254848       | Abcam (Cambridge, MA USA)                |
| GAPDH          | Mouse Monoclonal  | MCA4739        | Bio-Rad Laboratories (Hercules, CA, USA) |
| PARP           | Rabbit Polyclonal | #9542          | Cell Signaling (Danvers, MA, USA)        |
| $\beta$ -ACTIN | Mouse Monoclonal  | A5441          | Sigma-Aldrich (St. Louis, MO, USA)       |
| Ago2           | Rabbit Monoclonal | 03-110         | Millipore, Merck (Darmstadt, Germany)    |

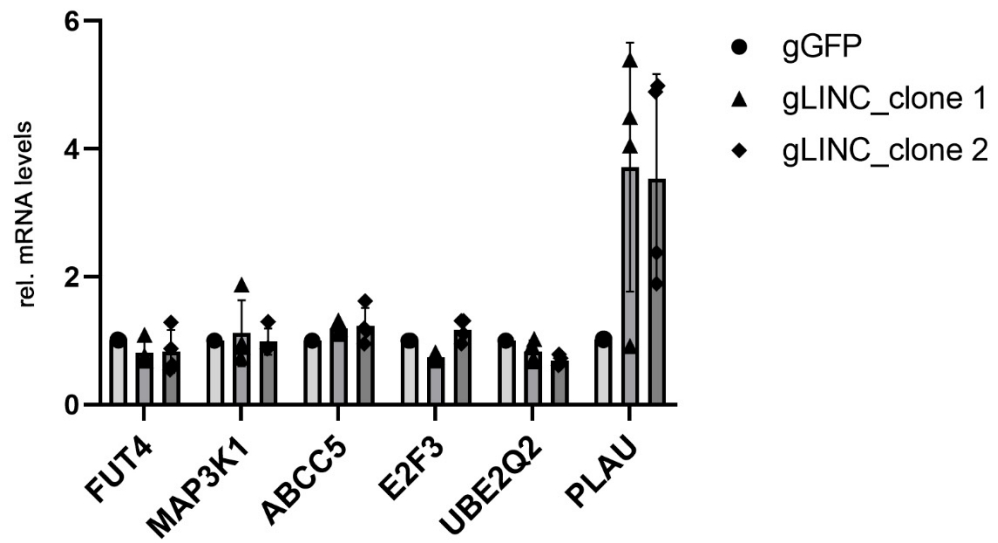

**Figure S1.** Unchanged expression of some genes potentially involved in the LINC00152-driven ceRNA network. Data are represented as mean  $\pm$  SD of 4 biological replicates. Abbreviations: gGFP, guide RNA targeting GFP; gLINC, guide RNA targeting *LINC00152*; rel., relative.

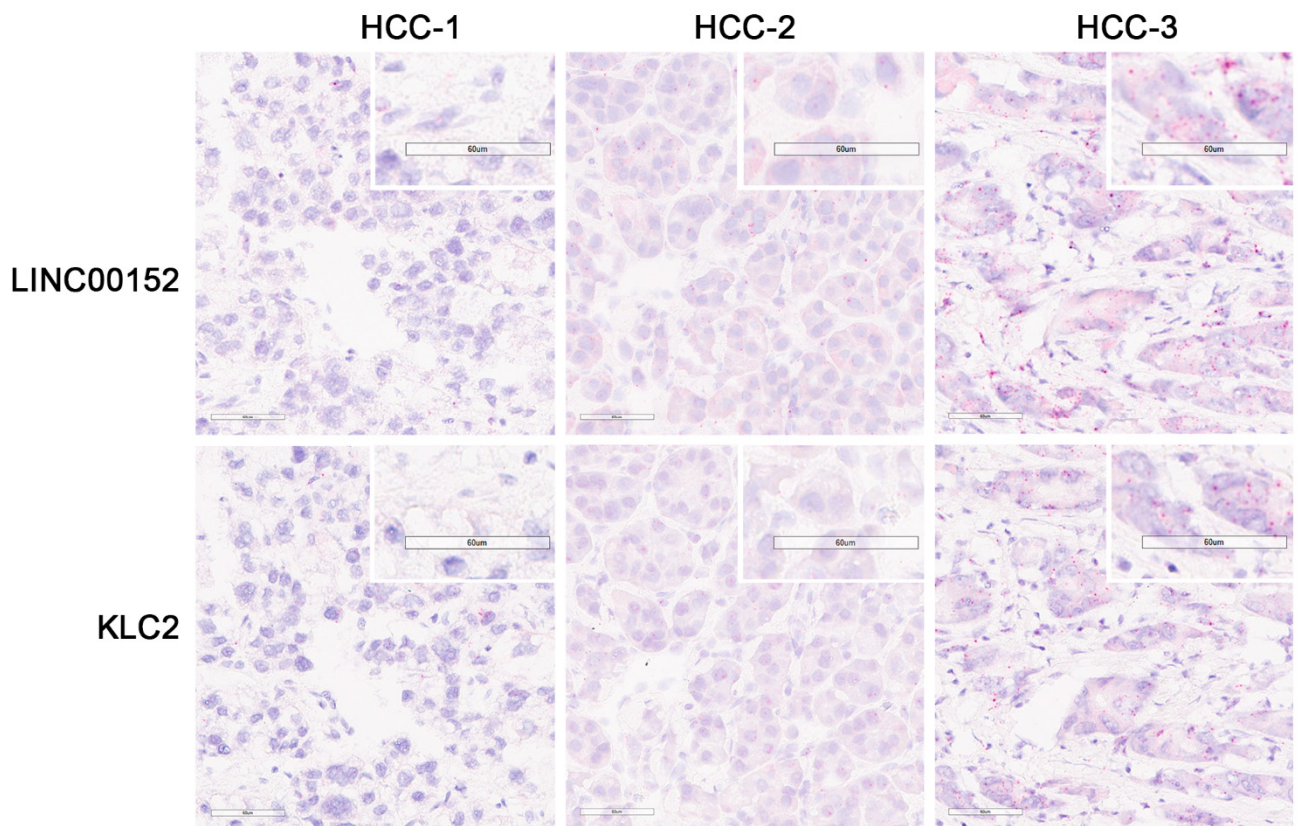

**Figure S2.** KLC2 and LINC00152 RNAs are co-expressed in human HCC. Additional representative images of human HCCs from TMA analysed by RNA-scope technology in Figure 5B; high LINC00152 RNA signals are associated with high KLC2 levels and vice versa.
